# Supplementary material for: Switch of fungal to bacterial degradation in natural, drained and rewetted oligotrophic peatlands reflected in δ 15 N and fatty acid composition
Source: Copernicus journal article supplement (doi:10.5194/soil-6-299-2020), 2020-07-17
Supplement: Supplementary file 1 [file soil-6-299-2020-supplement.zip]

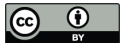

## *Supplement of*

# **Switch of fungal to bacterial degradation in natural, drained and rewetted oligotrophic peatlands reflected in $\delta^{15}\text{N}$ and fatty acid composition**

**Miriam Groß-Schmölders et al.**

*Correspondence to:* Miriam Groß-Schmölders ([miriam.gross-schmoelders@unibas.ch](mailto:miriam.gross-schmoelders@unibas.ch))

- [soil-6-299-2020-supplement-title-page.pdf](#)
- [Supplementary material.xlsx](#)

The copyright of individual parts of the supplement might differ from the CC BY 4.0 License.
