# Supplementary material for: Switch of fungal to bacterial degradation in natural, drained and rewetted oligotrophic peatlands reflected in δ 15 N and fatty acid composition
Source: Copernicus journal article supplement (doi:10.5194/soil-6-299-2020), 2020-07-17
Supplement: Supplementary file 1 [file Supplementary material.xlsx]

## Sheet: Tab.S1
	Table S1: Level of error probability according to T-tests of ∂15N measurements to identify significant differences (p<0.05, marked in red) between the drainage-affected and the natural sites; black border: normalized turning point of ∂15N, drained sites: Degerö (DD), Lakkasuo (ombrotrophic (LDo), minerotrophic (LDm), Rotmeer (RD1, RD2), Ursee (UD), Breitlohmisse (BNd, BD1, BD2)
	depth (cm)	all	DD	LDo	LDm	RD1	RD2	UD	BNd	BD1	BD2
	2	0.01	0.18	0.38	0.01	0.21	0.28	0	0.12	0.03	0.06
	4	0	0.25	0.85	0.07	0.19	0.19	0.36	0.17	0.3	0.04
	5	0.03	0.52	0.13	0.25	0.34	0.23	0.66	0.2	0.59	0.06
	7	0.28	0.89	0.03	0.25	0.08	0.34	0.77	0.09	0.72	0.04
	8	0.5	0.4	0	0.35	0.12	0.88	0.83	0.04	0.83	0.15
	10	0.79	0.06	0	0.4	0.05	0.99	0.97	0.13	0.55	0.07
	12	0.55	0.28	0	0.7	0.34	0.94	0.34	0.11	0.77	0.06
	14	0.02	0.16	0	0.47	0.26	0.28	0.02	0.99	0.63	0.02
	17	0.02	0.35	0	0.6	0.01	0.48	0.1	0.33	0.13	0.61
	20	0	0.02	0.01	0.21	0.07	0.05	0.03	0.03	0.12	0.06
	24	0.05	0.26	0.05	0.05	0.39	0.25	0.05	0.34	0.24	0.59
	28	0.61	0.42	0.98	0.01	0.12	0.41	0.08	0.4	0.35	0.94
	32	0.39	0.84	0.61	0.02	0.36	0.41	0.19	0.44	0.17	0.72
	36	0.96	0.9	0.2	0.04	0.9	0.84	0.34	0.73	0.47	0.19
	41	0.07	0.21	0.06	0.13	0.7	0.76	0.78	0.11	0.32	0.09
	45	0.19	0.27	0.11	0.14	0.65	0.68	0.18	0.12	0.52	0.09
	50	0.58	0.37	0.4	0.24	0.44	0.41	0.26	0.29	0.15	0.23
	54	0.66	0.65	0.28	0.63	0.93	0.61	0.8	0.53	0.76	0.16
	59	0.85	0.54	0.88	0.26	0.12	0.14	0.29	0.29	0.26	0.59
	62	0.74	0.42	0.09	0.12	0.59	0.66	0.73	0.74	0.92	0.98
	66	0.56	0.54	0.17	0.11	0.37	0.4	0.34	0.56	0.35	0.28
	68	0.36	0.31	0.93	0.08	0.46	0.22		0.45	0.73	0.66

## Sheet: Tab.S2
	Table S2: Correlation coefficient r (Spearman) of trends for the whole core (= overall slope) and for separated sections; Degerö (DD), Lakkasuo (ombrotrophic (LDo), minerotrophic (LDm), Breitlohmisse (BNd, BD1, BD2), Rotmeer (RD1, RD2), Ursee (UD), rewetted horizon (RW), upper mesotelm (UM), lower mesotelm (LM), catotelm (Cat)
		natural		drained
	site	overall		overall	section
					RW	UM	LM	Cat
	DD	0.35		0.17	0.98	0.99	0.95	0.29
	LDo	0.25		0.07		0.95	0.99	0.15
	LDm	0.52		0.08	0.5	0.91	1	0.45
	BNd	0.56		0.29		0.99	0.87	0.22
	BD1	0.56		0.01		0.85	0.94	0.26
	BD2	0.56		0.23		0.89	1	0.07
	RD1	0		0.11		0.73	0.5	0.63
	RD2	0.11		0.04		0.93	0.99	0.56
	UD	0.13		0	0.01	0.73	0.98	0.04
	average	0.34		0.11	0.5	0.89	0.91	0.3

## Sheet: Tab.S3
	Table S3: Trend values of all sites [‰/cm]; slopes are given for the whole core (=overall) and for separated sections (rewetted horizon (RW), upper mesotelm (UM), lower mesotelm (LM), catotelm (Cat)); Degerö (DD), Lakkasuo (ombrotrophic (LDo), minerotrophic (LDm), Breitlohmisse (BNd, BD1, BD2), Rotmeer (RD1, RD2), Ursee (UD))
		natural			drained
	site	overall				overall	section
							RW	UM	LM	Cat
	DD	9.66			5.83		-7.08	1.58	-2.04	11.24
	LDo	8.47			6.14			4.06	-5.1	-9.49
	LDm	25.18			-6		-16.95	3.17	-1.78	-10.53
	BNd	23.82			8.39			2.19	-2.06	-8.8
	BD1	23.82			-3.28			4.34	-2.25	6.43
	BD2	23.82			9.06			3.22	-3.66	3.34
	RD1	3.21			-4.58			2.09	-2.78	-9.24
	RD2	4.83			-2.57			0.38	-1.89	-11.39
	UD	7.76			0.98		2.52	13.76	-4.82	2.78

## Sheet: Tab.S4
	Table S4: Humification Indices (HI) after von Post for all investigated sites; Degerö (natural (DN), drained (DD)), Lakkasuo (ombrotrophic natural (LNo), ombrotrophic drained (LDo), minerotrophic natural (LNo), minerotrophic drained (LDm)), Breitlohmisse (natural (BN), drained (BNd, BD1, BD2)), Ursee (natural (UN), drained (UD)), Rotmeer (natural (RN), drained (RD1, RD2))
	site	natural	rewetted horizon (if present)	mesotelm		catotelm
	DN	H1-2					H3
	DD		H2-H3		H4		H3
	LNo	H2					H3
	LDo				H4-H5		H3
	LNm	H2					H3
	LDm		H3		H4		H3
	BN	H3					H3
	BNd				H4		H2-H3
	BD1				H4		H3
	BD2				H4		H3
	UD		H3		H3-H4		H2-H3
	UN	H2					H2
	RN	H2					H3
	RD1				H4		H3
	RD2				H4		H3

## Sheet: Tab.S5
15N stable isotope values [‰]
																																														15N stable isotope values [‰]
Degerö									Lakkasuo																	Breitlohmisse																Rotemeer Moor
	Nautral sites (DN) 1-3				Drained sites (DD)					Natural sites (LNo) 1-3								Natural sites (LNm) 1-3									Natural sites (BN) 1-3				Natural dry sites (BNd) 1-3				Drained sites (BD1) 1-3				Near the edge sites (BD2) 1-3				Natural sites (RN) 1-3				Drained sites (RD1) 1-3
depth [cm]	DN1	DN2	DN3	av. DN	DD1	DD2	DD3	av. DD	depth [cm]	LNo1	LNo2	LNo3	av. LNo	LDo1	LDo2	LDo3	av. Ldo	LNm1	LNm2	LNm3	av. LNm	LDm1	LDm2	LDm3	av. LDm	depth [cm]	BN1	BN2	BN3	av. BN	BNd1	BNd2	BNd3	av. BNd	BD11	BD12	BD13	av. BD1	BD21	BD22	av. BD2	depth [cm]	RN1	RN2	RN3	av. RN	RD11	RD12	RD13
1	-9.95245	-9.03367	-7.17946	-8.72186	-8.47774	-7.46999	-5.39052	-7.11275	1	-3.45699	-6.48788	-4.91921	-4.95469	-1.02414	-0.945366	-2.33013	-1.43321	-5.45403	-5.3867	-5.6968	-5.51251	-4.30885	-6.04646	-5.6968	-5.3507	2	-3.81017	-3.45833	-2.29	-3.18617	-5.27368	-7.06363	-13.9921	-8.77648	-6.44582	-6.05	-6.24791	-5.86076	-8.39252	-8.61574	-8.50413	1	-0.173823	-7.04914	-4.19087	-3.80461	-6.33854	-11.4391	-12.1635
5	-9.31217	-7.14823	-7.70875	-8.05639	-10.6375	-7.43683	-5.00872	-7.69436	5	-6.44052	-5.32996	-6.41271	-6.06106	-1.37532	-2.47422	-5.60534	-3.15163	-2.29383	-3.93305	-4.12074	-3.44921	-7.97591	-11.9172	-4.12074	-8.00462	4	-3.16492	-2.27845	-3.97814	-3.1405	-4.92808	-7.35685	-13.1595	-8.48148	-4.95565	-6.61	-5.78282	-6.26169	-10.3455	-7.40967	-8.87757	3	-14.3963	-11.4601	-8.22213	-11.3595	-7.86397	-11.6165	-4.1309
9	-7.049	-5.43436	-5.12791	-5.87043	-9.97217	-9.25055	-5.91162	-8.37811	9	-5.80202	-5.6192	-6.21189	-5.8777	-0.92635	-1.62088	-4.97606	-2.50777	-1.75607	-0.913437	-1.79357	-1.4877	-0.705885	-11.267	-1.79357	-4.58882	6	-3.15223	-3.14308	-3.0082	-3.10117	-5.44981	-5.55197	-12.8995	-7.96708	-3.23057	-4.74	-3.98529	-5.39706	-7.04271	-6.62492	-6.83381	5		-12.1568	-9.92682	-11.0418	-7.66053	-11.0409	-7.46459
13	-6.3249	-6.04003	-7.06203	-6.47565	-0.294114	-3.59896	-4.5673	-2.82012	13	-5.33883	-5.90843	-6.01107	-5.75278	-0.94101	-0.754004	-2.93766	-1.54423	-1.32464	-1.03172	-2.45062	-1.60233	1.35245	-4.81815	-2.45062	-1.97211	8	-3.26292	-3.77724	-3.09921	-3.37979	-4.09166	-6.56325	-10.885	-7.17999	-3.15457	-4.49	-3.82228	-4.38449	-7.64851	-3.16871	-5.40861	7		-6.82461	-12.717	-9.77081	-5.31911	-10.94	-9.51873
17	-5.71732	-2.57092	-3.75969	-4.01598	-3.86495	-2.71596	-2.89057	-3.15716	17	-4.87564	-4.28734	-4.54442	-4.56913	-1.67309	-0.0626139	-8.72897	-3.48822	0.185981	-1.81807	-2.12659	-1.25289	-1.00987	-4.07204	-2.12659	-2.40283	10	-2.33903	-3.24018	-2.79536	-2.79152	-4.62144	-6.20494	-11.2014	-7.3426	-3.04785	-1.93	-2.48893	-4.81642	-8.31055	-5.34565	-6.8281	9	-15.1087	-8.08034	-13.4814	-12.2235	-6.70824	-10.9787	-9.50013
21	-7.07365	-5.31596	-3.67703	-5.35555	-5.49247	1.06613	-0.317883	-1.58141	21	-3.87505	-3.28718	-4.18041	-3.78088	-1.20122	-0.929024	-1.12367	-1.08464	-0.46374	-2.91888	-3.88536	-2.42266	-1.59708	-3.50239	-3.88536	-2.99495	12	-2.58687	-2.83082	-2.72645	-2.71472	-5.00232	-5.66442	-10.3355	-7.00076	-5.17601	-1.01	-3.093	-3.16803	-6.08984	-3.678	-4.88392	11	-13.5259	-6.84969	-6.64308	-9.00624	-9.21022	-9.64494	-7.28833
25	-5.13974	-3.83291	-1.735	-3.56922	-4.83059	-2.28611	1.8265	-1.7634	25	-2.87446	-2.54494	-2.83083	-2.75008	-0.617906	-1.98119	-1.68559	-1.42823	-2.40672	-2.09483	-3.64829	-2.71661	-1.13661	-2.03206	-3.64829	-2.27232	14	-2.75624	-3.74947	-2.74881	-3.08484	-4.54397	-3.86905	-8.44419	-5.61907	-5.5796	-1.86	-3.7198	-1.97959	-5.47539	-4.44518	-4.96029	13	-13.7143	-7.68468	-8.78551	-10.0615	-4.79636	-4.43817	-6.14932
29	-5.93433	-5.72275	-2.57119	-4.74276	-4.13454	-3.80704	0.167776	-2.59127	29	-0.910759	-3.11806	-2.34474	-2.12452	-0.967447	0.0982657	-1.33672	-0.735301	-2.62888	-2.26759	-3.52429	-2.80692	-2.22629	-4.00608	-3.52429	-3.25222	16	-2.44078	-3.95496	-2.76886	-3.05487	-2.45486	-4.94585	-6.24467	-4.54846	-6.24416	-3.48	-4.86208	-2.79316	-2.41528	-7.12734	-4.77131	15	-12.4505	-5.12832		-8.78939	-3.93591	-8.0711	-5.90257
33	-7.20105	-4.80148	-1.33845	-4.44699	-5.67969	-5.96656	-1.52653	-4.39093	33	-2.27512	-2.41091	-3.15565	-2.61389	-1.04889	-0.77821	-1.05636	-0.961156	-2.30911	-1.44524	-3.95885	-2.57107	-3.75703	-4.36589	-3.95885	-4.02726	18	-2.61198	-3.43217	-3.09368	-3.04595	-0.696781	-5.94963	-3.74947	-3.46529	-5.97955	-1.15	-3.56477	-4.10043	-1.86683	-0.334807	-1.10082	17	-12.9707	-6.22092	-6.26453	-8.48538	-3.41666	-5.9399	-4.76227
37	-6.80919	-4.58988	-1.04014	-4.14641	-4.9313	-5.36575	-3.80541	-4.70082	37	-2.23246	-1.74953	-5.00701	-2.99633	-0.55247	-0.899718	-1.03332	-0.828504	-2.14149	-0.0675628	-4.68953	-2.29953	-0.819168	-4.11497	-4.68953	-3.20789	20	-2.50114	-3.42767	-2.35628	-2.7617	-0.68627	-7.31876	-2.29794	-3.43432	-2.59449	-2.92	-2.75725	-5.31649	-2.83517	-1.90905	-2.37211	21	-13.585	-5.93631		-9.76067	-2.02421	-5.18095	-3.43814
41	-4.53396	-4.6338	-0.403264	-3.19034	-7.6784	-6.96027	-3.6926	-6.11042	41	-2.23246	-1.53896	-3.05201	-2.27448	-0.831249	-0.964347	-0.955845	-0.917147	-3.32432	0.185847	-2.41123	-1.8499	-1.3411	-3.94982	-2.41123	-2.56738	24	-1.8207	-3.2746	-1.23226	-2.10919	1.38139	-4.60995	-3.1117	-2.11342	-7.02428	-3.18	-5.10214	-6.33413	-1.22105	-5.17543	-3.19824	27	-14.5336	-7.25042	-8.03315	-9.93906	-1.68387	-3.8917	-4.573
45	-3.93804	-4.41394	-1.54635	-3.29944	-3.85243	-4.37028	-4.46778	-4.23016	45	-2.18979	-1.68886	-2.55213	-2.1436	-0.714422	-0.793119	-0.68448	-0.730674	-0.90608	-0.586439	-2.55684	-1.34979	-2.46519	-3.18392	-2.55684	-2.73532	28	-2.68698	-4.72802	-2.65253	-3.35584	0.900599	-4.95618	-4.72017	-2.92525	-12.4157	-4.84	-8.62786	-5.679	-2.44412	-6.62023	-4.53218	29	-3.99988			-3.99988	-2.46038	-7.32854	-3.33337
49	-4.29084	-2.49132	-1.45002	-2.74406	-2.33824	-3.68992	-2.67447	-2.90088	49	0.618851	-0.313482	1.51088	0.605415	-0.0812245	0.494572	0.046012	0.15312	0.657288	-0.279762	0.289638	0.222388	-2.93885	-2.96167	0.289638	-1.87029	32	-2.44639	-4.90807	-4.8691	-4.07452	-2.05438	-2.28172	-2.9133	-2.41647	-11.6873	-3.03	-7.35867	-4.59999	-4.4574	-6.90049	-5.67895	33	-10.2398	-6.31857	-9.59133	-8.71658	-3.46544	-4.21424	-3.07715
53	-4.13099	-4.13368	-3.13259	-3.79908	-5.21035	-5.76829	-3.03325	-4.67063	53	-0.557069	-0.111194	-2.6447	-1.10432	-0.610109	-0.525547	-1.15654	-0.764065	-0.973385	-2.13039	-1.10131	-1.40169	-3.95461	-4.62671	-1.10131	-3.22754	36	-1.99737	-4.43949	-4.43251	-3.62312	-2.76018	-3.34731	-5.02223	-3.70991	-6.3708	-5.52	-5.9454	-4.34418	-4.94787	-4.8467	-4.89728	37	-11.0151	-10.7421	-6.31662	-9.35792	-4.67955	-4.3095	-4.44881
57	-6.07012	-3.89864	-2.94023	-4.303	-3.06924	-4.6817	-0.972716	-2.90789	57	0.0351852	-0.488192	-0.351922	-0.26831	-0.568822	-0.497606	-0.324196	-0.463541	-0.192104	-0.548815	-4.94652	-1.89581	-4.84302	-3.15287	-4.94652	-4.31414	40	-2.38348	-1.95013	-1.67868	-2.0041	-2.46658	-1.83474	-6.66172	-3.65434	-4.53935	-4.63	-4.58468	-4.25068	-4.83131	-6.4295	-5.63041	41	-8.57298	-5.50785	-7.02968	-7.03684	-4.53791	-2.72091	-5.22382
61	-6.7919	-4.25362	-2.0768	-4.37411	-5.38763	-5.4597	-2.56388	-4.4704	61	-0.370404	-2.12053	-2.99598	-1.82897	-0.71927	-0.755613	-1.01806	-0.83098	0.938083	-4.02653	-4.9768	-2.68842	-4.58964	-4.60924	-4.9768	-4.72523	44	-1.49342	-2.16594	-1.67529	-1.77821	-2.70119	-1.84184	-6.95603	-3.83302	-2.4121	-3.49	-2.95105	-2.63677	-4.28164	-7.01818	-5.64991	45	-11.2244	-6.56218	-6.37439	-8.05365	-6.0576	-3.02773	-7.66809
65	-6.25447	-5.27502	-3.8747	-5.13473	-4.63232	-2.75802	-1.7401	-3.04348	65	-1.6915	-3.26438	-2.78083	-2.57891	-0.624699	-0.801601	-1.75334	-1.05988	-1.94256	-4.3327	-4.68131	-3.65219	-3.81217	-3.16248	-4.68131	-3.88532	48	-1.08042	-1.07831	-1.88621	-1.34831	-2.90696	-5.63853	-7.7951	-5.44687	-3.58942	-0.23033	-1.90988	-2.27462	-3.96036	-7.60685	-5.78361	49	-11.8171	-9.58901	-14.5275	-11.9779	-6.04836	-4.29529	-10.0708
69	-5.53027	-4.86149	-2.71089	-4.36755	-3.84545	-2.92809	-1.46065	-2.74473	69	-1.93664	-3.20268	-2.56569	-2.56834	-1.1591	-1.09043	-1.51802	-1.25585	-3.16484	-4.47566	-3.504	-3.71483	-5.71841	-3.90288	-3.504	-4.3751	52	-2.30682	-2.79816	-0.169417	-1.75813	-3.24861	-3.05274	-9.19849	-5.16661	-4.46044	-2.42719	-3.44381	-2.0008	-3.1672	-4.37717	-3.77219	53	-12.234	-6.97721	-10.8889	-10.0334	-8.82639	-3.25522	-7.32389
73	-9.70169	-3.84851	-4.02965	-5.85995	-5.67916	-4.17126	-1.4394	-3.76327	73	-2.30652	-2.24935	-4.67277	-3.07621	-0.974827	-1.31458	-1.20872	-1.16604	-3.01778	-3.55113	-4.45114	-3.67335	-3.02925	-5.07657	-4.45114	-4.18565	56	-2.55856	-3.19303	-2.35465	-2.70208	-3.64787	-4.39731	-9.30642	-5.78387	-4.84332	-1.75254	-3.29793	-4.35735	-4.04888	-3.19628	-3.62258	57	-10.5582	-5.71125	-9.33311	-8.53418	-7.54998	-3.78877	-7.07291
77	-6.82281	-4.18262	-3.11503	-4.70682	-4.47543	-4.57376	-2.2764	-3.7752	77	-3.10479	-4.01699	-5.54848	-4.22342	-0.889834	-0.535864	-1.55303	-0.992908	-2.41373	-3.65871	-3.56452	-3.21232	-5.00223	-5.09604	-3.56452	-4.55426	60	-1.8229	-4.96623	-2.73	-3.17305	-2.79651	-4.50397	-8.16278	-5.15442	-4.80431	-2.55253	-3.67842	-3.86833	-1.15232	-1.46038	-1.30635	61	-12.133	-10.4798	-10.1905	-10.9344	-6.48744	-5.71423	-6.70925
81		-4.70971	-3.94458	-4.32714	-2.66597	-2.57337	-2.77534	-2.67156	81	-3.32407	-4.49899	-4.89841	-4.24049	-0.290016	-0.568671	-0.78629	-0.548325	-1.58948	-2.11234	-4.51115	-2.73766	-5.22165	-5.45484	-4.51115	-5.06255	64	-1.23761	-4.50468	-3.58265	-3.10831	-2.47388	-3.28088	-8.9441	-4.89962	-5.79788	-2.57773	-4.18781	-3.39568	-3.29917	-0.894819	-2.097	65	-5.42738	-7.6549	-10.3354	-7.80589	-6.89206	-3.98253	-10.4092
85		-6.03054	-4.03199	-5.03126	-3.22852	-2.0946	-4.3898	-3.23764	85	-4.26253	-4.99867	-4.95696	-4.73939	-0.108254	-0.618627	-0.692791	-0.473224	-2.06332	-2.39874	-5.73209	-3.39805	-5.46714	-4.90757	-5.73209	-5.36894	68	-1.08834	-3.47864	-2.71361	-2.42686	-2.4215	-1.22208	-10.3133	-4.65229	-0.840831	-2.371	-1.60592	-3.23251	-2.81981	-1.3822	-2.101	69	-9.0475	-6.77755	-5.51178	-7.11228	-9.02584	-5.43735	-9.11742
89					-5.38511	-3.95771	-2.34062	-3.89448	89	-5.32698	-4.37968	-2.07782	-3.92816	-0.0574244	-0.158341	-1.01775	-0.411173	-1.65495	-1.47234	-2.73044	-1.95258	-3.91819	-6.03658	-2.73044	-4.2284	72	-1.66762	-3.47559	-2.38397	-2.50906	-2.82025	0.836733	-7.40959	-3.13104	-5.30636	-3.66238	-4.48437	-5.58388	-4.79076	-1.19689	-2.99382	73	-5.7845	-6.18554	-7.75215	-6.57406	-5.208	-7.50203	-11.1728
93					-8.77045	-4.14894	-1.44277	-4.78739	93	-4.39962	-4.62064	-1.52294	-3.5144	-0.030499	-0.447993	-1.19622	-0.558238	-2.17616	-2.12487	-1.80775	-2.03626	-5.27364	-5.11557	-1.80775	-4.06565	76	-1.3776	-1.72496	-2.95714	-2.0199	-3.07019	-3.09089	-4.74687	-3.63598	-8.84745	-5.10519	-6.97632	-6.02854	-3.83493	-0.909602	-2.37227	77	-8.19628	-8.25008	-9.45536	-8.63391	-11.173	-8.87082	-11.139
																										80	-1.80484	0.13845	-3.19623	-1.62088	-1.705	-1.13301	-1.92408	-1.58736	-7.35089	-4.30391	-5.8274	-7.49847	-4.8819	-4.13055	-4.50623	81	-8.08051	-6.04403	-7.64233	-7.25562	-9.85578	-5.84072	-10.0791
																										84	-0.984488	0.501476	-1.88817	-0.790394	-2.50538	-1.36944	-3.46606	-2.44696	-10.764	-3.97652	-7.37023	-5.1738	-4.5295	-4.31552	-4.42251	85	-11.3194	-11.9757	-8.59048	-10.6285	-8.51541	-6.27149	-11.6881
																										88	-0.116018	0.0163695	-1.1764	-0.42535	-1.62122	-1.15852	-1.61941	-1.46638	-10.6396	-3.24433	-6.94197	-5.8227	-2.72992	-3.19184	-2.96088	89	-10.1114	-5.83632	-8.47929	-8.14232	-10.6739	-5.38789
																										92	-0.0974569	-3.20922	-1.15499	-1.48722	-1.75826	-4.66601	-4.5721	-3.66546	-9.96191	-2.51214	-6.23703	-5.7049	-4.186	-0.500039	-2.34302		-11.7445	-6.64589	-8.67213	-9.02085
																										96	1.80779	-3.55035	0.0779389	-0.554874	-0.360505	-1.68139	-3.95079	-1.99756	-13.5236	-4.46581	-8.99471	-6.61692	-4.39775	-5.58788	-4.99281		-8.27418	-10.0664	-6.71623	-8.35227
																										100	0.787968	-2.15945	1.52163	0.0500498	-1.16517	-2.7216	-5.80243	-3.22973	-11.0528	-5.07476	-8.06379	-4.32508	-3.88339	-5.04443	-4.46391		-15.2889	-8.6451	-6.06077	-9.99827
																										102	-1.81462	-3.62719	0.420712	-1.6737	-1.04824	-2.70017	-3.70613	-2.48485	-9.23484	-5.53961	-7.38723	-5.42376	-4.26763	-5.34995	-4.80879		-10.337	-9.1169	-7.43585	-8.96326
																										104		-3.03276	-1.46671	-2.24973	-0.331791	-2.21673		-1.27426	-11.884	-6.40415	-9.14409	-4.43089	-5.28652	-3.83056	-4.55854		-8.24434	-7.85781	-6.06077	-7.38764
																										108			-1.81701	-1.81701	-0.935648	-0.605853		-0.770751	-11.984		-11.984						-8.14456	-13.0877	-7.43585	-9.55602
																										112			-2.40061	-2.40061													-8.21422			-8.21422
[truncated: 14 more columns]

## Sheet: Tab.S6
13C stable isotope values [‰]
Degerö									Lakkasuo																	Breitlohmisse																	Rotemeer Moor
	Nautral sites (DN) 1-3				Drained sites (DD)					Natural sites (LNo) 1-3								Natural sites (LNm) 1-3									Natural sites (BN) 1-3				Natural dry sites (BNd) 1-3				Drained sites (BD1) 1-3				Near the edge sites (BD2) 1-3					Natural sites (RN) 1-3				Drained sites (RD1) 1-3
depth [cm]	DN1	DN2	DN3	av. DN	DD1	DD2	DD3	av. DD	depth [cm]	LNo1	LNo2	LNo3	av. LNo	LDo1	LDo2	LDo3	av. Ldo	LNm1	LNm2	LNm3	av. LNm	LDm1	LDm2	LDm3	av. LDm	depth [cm]	BN1	BN2	BN3	av. BN	BNd1	BNd2	BNd3	av. BNd	BD11	BD12	BD13	av. BD1	BD21	BD22	BD23	av. BD2	depth [cm]	RN1	RN2	RN3	av. RN	RD11	RD12
1	-23.2857	-23.1586	-23.5593	-23.3345	-29.1071	-27.4302	-28.6332	-28.3902	1	-27.1809	-27.9104	-26.384	-27.1584	-29.1297	-29.6715	-28.242	-29.0144	-31.0384	-30.3564	-30.7255	-30.7068	-30.1373	-30.3317	-30.7255	-30.3982	2	-25.9292	-24.7737	-28.8527	-26.5185	-28.7774	-30.042	-29.735	-29.5181	-27.8028	-27.0454	-28.46	-27.7694	-29.1074	-28.4879	-30.0923	-29.2292	1	-26.9339	-27.7731	-26.1555	-26.9542	-27.6402	-28.4357
5	-23.0552	-23.896	-24.1504	-23.7005	-29.627	-27.8967	-28.7877	-28.7705	5	-27.6265	-26.981	-26.0206	-26.876	-29.3056	-29.5995	-29.2241	-29.3764	-28.1836	-29.8525	-28.1863	-28.7408	-29.7486	-30.0348	-28.1863	-29.3233	4	-27.1201	-25.2705	-29.2307	-27.2071	-28.544	-29.053	-29.6234	-29.0735	-26.8501	-26.6206	-27.53	-27.0002	-28.9491	-28.4614	-28.7005	-28.7036	3	-27.5248	-28.0878	-26.7455	-27.4527	-28.0202	-28.3071
9	-23.3891	-23.8362	-24.0005	-23.7419	-29.7391	-28.178	-28.81	-28.909	9	-27.0863	-27.3773	-26.5686	-27.0107	-29.2983	-29.8743	-29.1402	-29.4376	-27.4074	-27.6027	-27.5354	-27.5152	-28.6508	-30.0042	-27.5354	-28.7301	6	-26.8279	-25.5257	-27.6941	-26.6826	-28.4385	-29.394	-29.5596	-29.1307	-27.2339	-26.0178	-26.85	-26.7006	-29.387	-28.4795	-27.7547	-28.5404	5	-27.4588	-27.73	-26.8037	-27.3308	-27.8517	-28.3355
13	-24.0876	-23.5447	-24.7618	-24.1314	-27.2674	-27.8473	-27.8003	-27.6383	13	-27.2163	-28.4665	-26.0794	-27.254	-28.8717	-29.5765	-28.6637	-29.0373	-26.5974	-26.4047	-25.9165	-26.3062	-27.7579	-28.7032	-25.9165	-27.4592	8	-26.4522	-25.3578	-27.3156	-26.3752	-27.9346	-29.2161	-29.5181	-28.8896	-26.5855	-26.1202	-26.6	-26.4352	-28.5957	-28.6651	-28.6045	-28.6218	7	-26.786	-27.8196	-26.5851	-27.0635	-28.0027	-27.8573
17	-24.6358	-24.4641	-24.9822	-24.694	-25.4345	-27.6265	-27.3319	-26.7976	17	-27.007	-28.1026	-26.491	-27.2002	-27.4746	-27.772	-28.0645	-27.7704	-25.9837	-25.8844	-25.8355	-25.9012	-28.0377	-28.0425	-25.8355	-27.3052	10	-26.9789	-26.6877	-27.2603	-26.9756	-28.8469	-29.1657	-29.2851	-29.0992	-25.9876	-25.8413	-26.8	-26.2096	-28.7445	-27.9291	-28.1181	-28.2639	9	-27.0707	-27.8171	-26.4967	-27.1282	-28.8262	-27.7793
21	-24.0097	-23.875	-25.092	-24.3256	-25.1144	-27.127	-27.7558	-26.6657	21	-27.0122	-27.7605	-27.7133	-27.4953	-27.9582	-27.5712	-28.1766	-27.902	-25.2304	-26.2013	-25.6705	-25.7007	-27.3328	-27.9785	-25.6705	-26.9939	12	-26.13	-26.9321	-27.7613	-26.9411	-28.6412	-28.6524	-29.3199	-28.8712	-25.6458	-25.5635	-26.89	-26.0331	-28.0815	-27.3257	-27.0458	-27.4843	11	-27.13	-27.5717	-26.8647	-27.1888	-29.1893	-27.6584
25	-24.2307	-24.046	-24.5606	-24.2791	-25.2593	-25.942	-26.7926	-25.9979	25	-26.8135	-26.3438	-28.2154	-27.1242	-28.251	-27.3527	-27.829	-27.8109	-25.4418	-25.676	-25.8134	-25.6437	-27.823	-27.7653	-25.8134	-27.1339	14	-25.6372	-26.882	-26.1369	-26.2187	-28.786	-26.5767	-29.1417	-28.1681	-24.7482	-24.4911	-26.01	-25.0831	-27.9137	-27.4076	-26.993	-27.4381	13	-27.0826	-27.9123	-27.2165	-27.4038	-28.93	-28.0288
29	-24.0591	-24.614	-24.5783	-24.4172	-25.6882	-25.3054	-25.6335	-25.5424	29	-27.6281	-25.288	-28.3633	-27.0931	-28.1362	-27.5203	-27.5772	-27.7446	-25.4531	-26.5169	-24.6702	-25.5467	-27.3851	-27.7632	-24.6702	-26.6061	16	-25.9667	-26.9273	-26.1581	-26.3507	-27.9229	-26.048	-28.0968	-27.3559	-25.1645	-24.4129	-26.08	-25.2191	-27.3154	-27.0975	-25.7071	-26.7067	15	-27.6356	-28.5892		-28.1124	-28.0099	-28.1758
33	-23.7579	-24.4053	-24.3057	-24.1563	-25.0966	-25.2588	-25.5857	-25.3137	33	-26.4626	-26.5034	-26.3086	-26.4249	-28.0598	-27.7698	-27.7043	-27.8447	-24.848	-25.9718	-24.6728	-25.1642	-27.6119	-27.9431	-24.6728	-26.7426	18	-25.833	-26.7323	-26.1255	-26.2303	-27.3539	-26.2457	-26.9941	-26.8646	-25.0578	-25.273	-25.14	-25.1569	-26.3794	-27.1725	-26.1469	-26.5663	17	-27.4694	-27.699	-26.8735	-27.3473	-28.0859	-28.2714
37	-23.8845	-23.8204	-24.1238	-23.9429	-26.9368	-25.3409	-25.4035	-25.8937	37	-26.2841	-26.2959	-27.951	-26.8437	-28.0111	-27.6857	-27.783	-27.8266	-25.1117	-26.709	-24.5308	-25.4505	-27.7209	-27.9959	-24.5308	-26.7492	20	-25.6255	-26.658	-26.1358	-26.1398	-26.9807	-25.6619	-26.6115	-26.418	-25.6624	-25.0229	-25.9	-25.5284	-26.1544	-27.4166	-25.2871	-26.2861	21	-27.312	-27.4204		-27.3662	-26.8074	-27.8854
41	-22.838	-23.629	-23.7975	-23.4215	-26.1707	-25.5791	-24.9762	-25.5754	41	-26.2841	-25.5889	-27.9793	-26.6174	-28.0582	-27.2541	-27.8201	-27.7108	-24.9886	-26.7489	-25.8248	-25.8541	-28.2236	-27.5451	-25.8248	-27.1979	24	-25.9342	-27.7121	-26.0097	-26.552	-25.8828	-25.0644	-25.5512	-25.4995	-24.4705	-24.4998	-26.12	-25.0301	-25.3128	-26.8481	-24.5033	-25.5547	27	-27.3342	-27.6951	-27.3257	-27.4516	-26.3021	-27.4425
45	-22.9631	-24.0604	-24.078	-23.7005	-25.8891	-26.0468	-25.1778	-25.7045	45	-26.1057	-25.9589	-27.3162	-26.4603	-27.8913	-27.5883	-27.9151	-27.7982	-26.1418	-27.3555	-26.9136	-26.8036	-28.2625	-27.8682	-26.9136	-27.6814	28	-25.765	-27.6697	-26.0828	-26.5059	-27.1807	-26.2352	-26.4005	-26.6054	-24.5481	-24.4821	-26.53	-25.1867	-26.3538	-26.3956	-24.6366	-25.7953	29	-27.2702			-27.2702	-26.4235	-26.8132
49	-23.2596	-24.8522	-23.3242	-23.812	-26.8984	-26.9842	-25.7862	-26.5563	49	-25.6719	-26.2127	-25.5807	-25.8218	-28.1101	-27.9629	-28.0789	-28.0506	-27.4525	-26.4654	-26.2474	-26.7218	-27.936	-28.2342	-26.2474	-27.4725	32	-25.8742	-27.3911	-27.1376	-26.801	-26.5288	-26.3981	-25.9819	-26.3029	-24.0543	-24.6027	-25.75	-24.8023	-26.1148	-26.3988	-24.2542	-25.5892	33	-27.2148	-27.8434	-27.3001	-27.4528	-25.5243	-26.1177
53	-24.154	-24.6231	-24.2017	-24.3263	-26.21	-26.3513	-25.4326	-25.9979	53	-25.7424	-26.2738	-25.3378	-25.7847	-27.9602	-27.5361	-27.9427	-27.813	-26.4984	-26.5788	-26.3242	-26.4671	-28.02	-27.8117	-26.3242	-27.3853	36	-26.069	-27.6797	-26.7083	-26.819	-25.0089	-24.803	-25.4891	-25.1003	-25.5539	-24.9815	-26.63	-25.7218	-26.2538	-26.4376	-24.8896	-25.8604	37	-27.299	-26.3007	-26.8795	-26.8264	-24.5943	-26.1466
57	-24.0009	-24.8587	-24.023	-24.2942	-26.8058	-26.7256	-26.0912	-26.5409	57	-25.7815	-26.6597	-25.9651	-26.1354	-28.1352	-27.5372	-27.91	-27.8608	-26.7282	-26.6788	-25.7203	-26.3758	-27.764	-27.9056	-25.7203	-27.13	40	-26.0491	-27.3724	-26.1841	-26.5352	-24.7381	-24.9139	-24.693	-24.7817	-26.6073	-25.7202	-26.83	-26.3858	-25.3632	-26.2459	-24.8599	-25.4897	41	-26.3614	-26.0138	-25.8103	-26.0618	-25.3837	-26.5401
61	-22.617	-24.3397	-26.1095	-24.3554	-26.5777	-26.8783	-25.7685	-26.4082	61	-27.3755	-26.0318	-25.2894	-26.2322	-27.7328	-27.848	-27.7714	-27.7841	-27.5921	-26.5315	-25.7765	-26.6334	-27.9886	-27.9894	-25.7765	-27.2515	44	-25.2637	-25.8175	-24.54	-25.2071	-25.061	-24.6914	-24.8297	-24.8607	-25.7349	-26.0076	-26.75	-26.1641	-27.5269	-26.4703	-25.4886	-26.4953	45	-26.1873	-25.9137	-25.7554	-25.9521	-26.1366	-26.6758
65	-23.7026	-24.5367	-24.0823	-24.1072	-26.9155	-26.7813	-26.28	-26.6589	65	-26.3213	-25.7677	-25.4926	-25.8605	-28.4925	-28.1516	-28.0521	-28.2321	-26.6603	-26.5641	-25.9838	-26.4027	-28.0125	-28.3142	-25.9838	-27.4368	48	-24.3986	-23.9787	-24.641	-24.3394	-24.611	-24.4745	-24.8146	-24.6334	-25.993	-25.796	-26.8956	-26.2282	-27.1712	-27.1809	-26.1174	-26.8231	49	-26.4695	-25.699	-25.3156	-25.828	-25.7407	-26.1206
69	-24.0912	-23.9806	-24.6332	-24.235	-27.0918	-27.1021	-26.7039	-26.9659	69	-26.1277	-25.9063	-25.8138	-25.9493	-28.2482	-27.932	-28.0146	-28.0649	-26.1408	-26.1755	-26.2636	-26.1933	-27.8351	-28.2899	-26.2636	-27.4629	52	-24.4903	-24.8438	-25.5496	-24.9613	-25.4445	-24.5267	-24.8595	-24.9436	-25.2567	-26.2215	-26.9855	-26.1546	-27.1789	-26.9004	-26.0776	-26.719	53	-25.8445	-25.8644	-24.9474	-25.5521	-25.6771	-25.8413
73	-24.6433	-24.9329	-24.4396	-24.6719	-26.8895	-27.0536	-26.7806	-26.9079	73	-26.4	-25.998	-24.8211	-25.7397	-28.1141	-27.9933	-28.106	-28.0711	-26.3772	-26.6827	-26.2163	-26.4254	-27.6438	-28.4161	-26.2163	-27.4254	56	-24.8628	-24.6834	-24.7972	-24.7811	-26.5244	-24.0982	-26.3823	-25.6683	-26.6804	-26.2871	-27.487	-26.8182	-27.1851	-27.1974	-26.2823	-26.8883	57	-25.4406	-26.1477	-25.1975	-25.5952	-25.7883	-26.427
77	-23.9739	-24.6959	-25.078	-24.5826	-27.2588	-27.1796	-26.8259	-27.0881	77	-26.3555	-25.8937	-24.4711	-25.5735	-28.009	-28.1946	-28.2737	-28.1591	-25.9417	-26.4174	-26.3875	-26.2489	-27.6468	-28.0593	-26.3875	-27.3646	60	-25.1232	-26.1188	-23.9531	-25.065	-24.8192	-25.4222	-25.8714	-25.371	-26.7898	-25.8823	-27.4382	-26.7034	-26.7338	-26.5617	-26.4686	-26.588	61	-24.8649	-26.1494	-24.8263	-25.2802	-25.4841	-25.7953
81		-25.7924	-25.2657	-25.529	-27.3715	-26.1773	-26.4418	-26.6635	81	-25.8269	-25.5843	-26.2537	-25.8883	-28.2147	-28.3457	-28.0576	-28.206	-26.1576	-26.8306	-25.9627	-26.317	-27.8949	-28.2939	-25.9627	-27.3838	64	-25.0407	-26.9647	-26.0241	-26.0098	-24.8969	-25.3944	-25.2583	-25.1832	-25.4012	-24.4317	-26.8296	-25.5541	-26.4623	-26.3883	-26.4013	-26.4173	65	-24.7686	-26.4487	-25.9685	-25.7286	-25.6745	-26.2036
85		-25.8762	-25.6109	-25.7436	-27.2954	-26.9631	-26.505	-26.9212	85	-26.8771	-26.5272	-25.9443	-26.4495	-28.1677	-28.2695	-28.4866	-28.3079	-26.7518	-27.2586	-26.0725	-26.6943	-27.6167	-28.3841	-26.0725	-27.3578	68	-25.4937	-26.8305	-25.7648	-26.0297	-25.9541	-25.2316	-26.0524	-25.746	-26.0595	-24.8002	-26.8023	-25.8873	-26.1346	-26.0556	-26.5896	-26.2599	69	-24.4731	-26.2161	-26.0192	-25.5695	-25.4855	-26.0983
89					-27.0463	-27.5271	-27.3085	-27.294	89	-25.2585	-25.6787	-26.1314	-25.6895	-28.4325	-28.2823	-27.9639	-28.2262	-26.7644	-26.7648	-26.8116	-26.7803	-28.0174	-28.4445	-26.8116	-27.7578	72	-25.5203	-26.3059	-26.0952	-25.9738	-26.1154	-25.0688	-26.0342	-25.7394	-25.9606	-25.8939	-26.8129	-26.2225	-26.2263	-26.1655	-26.6798	-26.3572	73	-25.4931	-26.3377	-25.8081	-25.8796	-25.1255	-25.8716
93					-26.3642	-27.4635	-26.7672	-26.865	93	-26.061	-25.8017	-26.5348	-26.1325	-28.329	-28.058	-28.1506	-28.1792	-26.7541	-26.669	-26.3593	-26.5942	-28.1942	-28.283	-26.3593	-27.6122	76	-24.7876	-26.6418	-25.9694	-25.7996	-26.4545	-25.708	-26.7384	-26.3003	-25.6925	-24.7871	-26.3554	-25.6117	-25.7955	-25.202	-26.4945	-25.8307	77	-26.0956	-26.1942	-24.9345	-25.7414	-24.0998	-25.316
																										80	-25.6661	-27.2876	-26.449	-26.4676	-25.9474	-25.6108	-26.0843	-25.8808	-24.856	-24.4622	-26.4678	-25.262	-25.9908	-24.775	-25.3286	-25.3648	81	-25.9632	-24.6788	-23.1482	-24.5967	-24.1006	-25.7272
																										84	-25.1784	-27.0429	-25.6844	-25.9686	-26.6565	-25.5588	-26.6047	-26.2733	-24.9894	-24.1707	-26.2932	-25.1511	-26.3634	-25.2392	-26.0389	-25.8805	85	-23.7414	-25.2449	-22.9409	-23.9757	-24.2964	-25.1163
																										88	-26.7538	-27.2201	-26.0051	-26.6597	-26.9394	-26.1331	-26.6656	-26.5794	-24.9515	-24.0325	-26.0382	-25.0074	-26.2436	-24.6006	-25.6309	-25.4917	89	-24.0841	-25.317	-23.106	-24.169	-25.3234	-25.424
																										92	-26.1899	-26.1723	-26.587	-26.3164	-26.6689	-26.3877	-26.8929	-26.6498	-25.5451	-24.7776	-25.7832	-25.3686	-25.2426	-25.1323	-25.3715	-25.2488		-23.3617	-24.3487	-22.1379	-23.2828
																										96	-26.4196	-24.8522	-26.433	-25.9016	-26.2961	-26.3089	-26.1041	-26.2364	-25.5874	-22.374	-25.2543	-24.4053	-25.9347	-24.8831	-25.0925	-25.3034		-23.4158	-23.9572	-22.4461	-23.273
																										100	-26.6261	-24.8419	-26.8521	-26.1067	-27.4003	-26.054	-26.9319	-26.7954	-25.3096	-24.2911	-25.4416	-25.0141	-25.8006	-24.8954	-25.4913	-25.3958		-24.6044	-23.3498	-23.6163	-23.8568
																										104	-24.9294	-24.0596	-26.3498	-25.1129	-27.2585	-26.2088	-27.1269	-26.8647	-24.8966	-23.4325	-24.7989	-24.376	-25.9553	-24.5764	-25.9982	-25.51		-23.4625	-23.1887	-23.1569	-23.2694
																										108		-24.6544	-25.9503	-25.3024	-26.265	-26.1432		-26.2041	-24.7314	-24.0023	-26.4315	-25.055	-25.0951	-24.6957	-25.5024	-25.0977		-22.4268	-23.3961	-6.06077	-17.2946
																										112			-25.8617	-25.8617	-26.4329	-26.4838		-26.4583		-24.2341		-24.2341						-22.2893	-24.5673	-7.43585	-18.0975
																													-25.8537	-25.8537														-22.0989			-22.0989
[truncated: 15 more columns]

## Sheet: Tab.S7
carob/nitrogen ratio
Degerö									Lakkasuo																	Breitlohmisse																	Rotemeer Moor
	Nautral sites (DN) 1-3				Drained sites (DD)					Natural sites (LNo) 1-3								Natural sites (LNm) 1-3									Natural sites (BN) 1-3				Natural dry sites (BNd) 1-3				Drained sites (BD1) 1-3				Near the edge sites (BD2) 1-3					Natural sites (RN) 1-3				Drained sites (RD1) 1-3
depth [cm]	DN1	DN2	DN3	av. DN	DD1	DD2	DD3	av. DD	depth [cm]	LNo1	LNo2	LNo3	av. LNo	LDo1	LDo2	LDo3	av. Ldo	LNm1	LNm2	LNm3	av. LNm	LDm1	LDm2	LDm3	av. LDm	depth [cm]	BN1	BN2	BN3	av. BN	BNd1	BNd2	BNd3	av. BNd	BD11	BD12	BD13	av. BD1	BD21	BD22	BD23	av. BD2	depth [cm]	RN1	RN2	RN3	av. RN	RD11	RD12
1	114.11	77.8102	76.7932	89.5711	66.0969	53.123	42.9856	54.0685	1	57.7047	50.1308	54.365	54.0668	43.3395	39.116	49.8941	44.1165	49.1391	49.2412	51.3131	49.8978	26.664	52.6	51.3131	43.5257	2	45.6589	47.7514	87.5247	60.3117	73.3916	46.9316	57.8731	59.3988	33.0939	25.8572	36.3873	31.7795	62.3664	53.0279	49.3477	54.914	1	42.0987	62.9689	41.271	48.7795	50.6287	54.841
5	138.084	65.6225	100.036	101.248	84.4893	49.7119	42.6038	58.935	5	60.5222	66.9847	63.2543	63.5871	40.6742	39.0399	57.4167	45.7103	34.1378	37.6083	52.4056	41.3839	23.4681	32.2784	52.4056	36.0507	4	31.9012	32.6266	40.0841	34.8706	103.195	59.6508	80.3064	81.0506	24.3133	22.7819	26.6616	24.5856	61.1501	82.2304	47.5147	63.6317	3	65.6484	82.7253	77.0794	75.151	71.7657	64.4425
9	102.486	42.8037	81.4746	75.5882	81.8118	57.6922	50.196	63.2333	9	94.9858	78.9608	63.0911	79.0125	31.2971	35.0002	62.298	42.8651	44.9958	37.9359	46.0274	42.9864	31.3417	32.3006	46.0274	36.5566	6	48.0004	37.1104	36.7493	40.62	105.008	48.4757	72.1106	75.1979	23.449	24.3531	24.0476	23.9499	59.4292	88.2735	48.6879	65.4635	5	102.051	73.7161	82.6127	86.1265	67.5894	60.8075
13	68.1574	54.9221	86.0309	69.7035	26.0391	43.3627	50.5623	39.988	13	91.4063	90.9368	62.9279	81.757	31.0345	25.286	43.6263	33.3156	54.5894	41.473	47.4819	47.8481	22.1948	20.5351	47.4819	30.0706	8	46.7479	43.1779	43.6412	44.5224	95.4272	49.6912	68.8407	71.3197	23.4696	33.4993	28.5575	28.5088	42.9421	82.2464	48.0988	57.7624	7	87.1056	49.1227	76.9089	71.0457	62.2966	65.2331
17	50.5601	37.0074	44.4824	44.0166	42.3458	22.7559	47.7388	37.6135	17	87.8268	87.6712	69.1027	81.5336	23.4399	18.7837	38.0305	26.7513	52.5116	50.046	47.9613	50.173	16.3208	15.6931	47.9613	26.6584	10	39.8689	57.1251	44.5005	47.1648	83.0318	46.9968	66.7507	65.5931	28.4021	41.6215	33.5495	34.5243	32.2157	71.739	38.2014	47.3854	9	70.26	52.5986	65.4126	62.7571	52.2327	63.3701
21	49.1989	31.3649	43.4473	41.3371	54.716	24.7649	34.2858	37.9222	21	72.3376	61.5707	52.4837	62.1307	15.0114	19.7575	20.9896	18.5861	63.6399	56.3975	53.3233	57.7869	17.5524	17.1956	53.3233	29.3571	12	32.3924	63.5947	55.7779	50.5883	89.2368	41.2938	64.8064	65.1123	34.0951	39.6785	41.8335	38.5357	27.9214	45.1857	36.0171	36.3747	11	58.6263	33.7838	52.1502	48.1868	36.4654	57.4461
25	63.1287	32.2629	39.807	45.0662	46.5682	39.4085	32.4572	39.478	25	56.8485	49.4797	41.288	49.2054	15.7475	20.4675	18.4299	18.215	80.3281	66.6868	57.2519	68.0889	17.3215	16.6383	57.2519	30.4039	14	39.4915	74.5914	52.0531	55.3786	68.2364	45.1754	57.3447	56.9188	45.114	47.6334	45.234	45.9938	29.0911	32.9702	39.6532	33.9049	13	57.4265	37.3153	47.3205	47.3541	24.2845	61.0665
29	55.9453	41.2024	39.4086	45.5188	41.4029	48.5198	38.3466	42.7565	29	40.3081	66.9929	35.0275	47.4428	17.9807	15.2259	17.3933	16.8666	81.1394	57.423	62.8699	67.1441	19.868	19.5052	62.8699	34.081	16	34.2425	67.042	56.8808	52.7218	39.9258	65.6028	41.0674	48.8653	52.5526	56.7449	47.0226	52.1067	37.4778	31.129	60.1419	42.9162	15	55.3771	39.2784		47.3278	23.7087	55.5602
33	63.6212	63.7517	42.8792	56.7507	53.9825	54.1631	38.1965	48.7807	33	42.5291	66.2933	55.3921	54.7382	19.7725	18.0468	17.1711	18.3301	60.4079	49.9969	66.6844	59.0297	19.8657	21.7634	66.6844	36.1045	18	39.3796	60.9311	54.1807	51.4971	36.2052	74.816	30.2341	47.0851	54.8469	66.3097	59.141	60.0992	53.9557	29.6987	40.5432	41.3992	17	60.062	30.8951	44.7405	45.2325	28.4719	49.8981
37	90.581	49.1428	41.0339	60.2526	43.4101	49.7434	46.0029	46.3855	37	39.2937	50.7789	65.7229	51.9318	20.9958	18.7192	19.2789	19.6646	59.7349	39.153	60.4535	53.1138	17.0523	20.3681	60.4535	32.6246	20	35.9215	64.8363	62.2912	54.3496	38.7134	80.7634	33.2086	50.8951	60.3894	75.9035	64.813	67.0353	80.1303	31.4309	54.3321	55.2978	21	61.181	33.8774		47.5292	23.9443	38.831
41	53.8021	46.7411	42.0144	47.5192	52.2079	53.0939	53.2997	52.8672	41	39.2937	57.8181	50.7567	49.2895	22.3302	20.4436	20.2012	20.9917	79.6102	27.6753	32.3213	46.5356	18.6108	24.187	32.3213	25.0397	24	54.2415	42.9284	63.0603	53.41	35.2654	78.5746	46.2628	53.3676	67.999	92.0595	95.5287	85.1957	95.9407	35.7323	72.5786	68.0839	27	54.7196	37.9421	47.7517	46.8044	27.3629	26.6559
45	44.8636	43.9446	39.9795	42.9292	41.7892	40.5747	57.8911	46.7516	45	36.0582	50.9611	45.8349	44.2847	22.6312	21.5873	20.2681	21.4955	35.1688	32.0996	37.5665	34.945	18.8336	21.0307	37.5665	25.8103	28	50.0625	57.2615	59.0331	55.4524	31.6274	42.6341	45.267	39.8429	73.9573	96.561	107.07	92.5296	88.4876	38.665	80.5623	69.2383	29	57.0816			57.0816	21.9775	40.8235
49	52.8315	36.1743	41.7991	43.6016	35.3034	40.7173	50.7402	42.2536	49	46.4477	45.4531	24.7769	38.8926	22.9143	22.7227	23.5196	23.0522	24.5159	45.0852	35.1522	34.9178	21.877	21.556	35.1522	26.1951	32	47.2684	65.2612	53.0348	55.1881	53.8959	27.8108	57.9766	46.5611	81.5398	96.8709	112.619	97.0099	78.611	43.3335	82.2574	68.0673	33	53.9497	27.8697	36.4134	39.411	30.9227	41.9283
53	40.8948	33.331	42.6699	38.9652	52.4192	53.0424	54.1277	53.1964	53	40.1842	37.2545	49.5948	42.3445	24.1237	22.4145	23.189	23.2424	40.2724	43.5319	29.2269	37.6771	20.9263	22.8124	29.2269	24.3219	36	46.2839	68.0361	45.6673	53.3291	77.9189	40.8732	58.5703	59.1208	72.0621	53.4871	80.8312	68.7935	50.0246	50.108	77.8477	59.3268	37	52.2041	60.0369	30.2254	47.4888	28.1873	31.2383
57	61.498	36.7372	48.6837	48.9729	35.0835	45.832	31.2458	37.3871	57	32.4435	31.5978	29.3349	31.1254	22.7987	21.8833	19.1288	21.2703	33.6643	30.6981	41.3409	35.2344	23.9706	23.3108	41.3409	29.5407	40	49.7867	53.5616	73.7564	59.0349	81.6304	55.4262	63.2484	66.7683	51.3452	50.1729	72.2141	57.9107	65.3189	41.892	75.8906	61.0338	41	52.7131	51.2038	49.2436	51.0535	35.9929	27.4077
61	72.9713	38.5492	35.5305	49.017	50.88	52.4973	41.5156	48.2976	61	21.293	55.507	43.3542	40.0514	24.4384	23.472	22.9315	23.614	22.8746	47.732	43.8548	38.1538	22.9228	24.0956	43.8548	30.2911	44	56.1454	55.2478	89.2645	66.8859	79.1479	63.6999	67.1735	70.0071	46.4339	36.9489	60.3527	47.9118	41.5029	47.6111	66.2381	51.784	45	67.7814	46.1267	62.2556	58.7213	31.3399	27.4794
65	75.5975	60.8129	52.241	62.8838	47.0272	36.4077	42.0466	41.8272	65	43.8959	61.5592	33.1288	46.1946	22.4881	22.944	24.197	23.2097	35.3491	56.0503	47.1729	46.1907	22.0214	22.6277	47.1729	30.6073	48	52.7022	56.7242	83.837	64.4211	96.8273	72.1325	80.3008	83.0869	42.32	40.17	49.0949	43.8616	44.5819	42.1406	56.5856	47.7693	49	58.3868	104.24	79.0804	80.5691	38.5904	25.1168
69	53.0864	54.9324	45.5478	51.1888	41.5412	36.0649	36.3158	37.9739	69	38.2447	50.9962	22.9034	37.3814	26.0612	23.2486	24.3832	24.5643	49.7385	60.1349	44.215	51.3628	26.3228	24.0162	44.215	31.518	52	55.1043	81.6569	72.5697	69.7769	100.853	61.4656	105.995	89.4381	31.6027	38.95	43.6801	38.0776	38.5272	36.6975	44.7802	40.0016	53	75.643	73.6037	69.6703	72.9723	49.646	32.1167
73	72.5649	46.2284	49.8356	56.2097	47.9539	45.862	35.1303	42.9821	73	42.7252	46.7287	36.3592	41.9377	24.7648	22.4975	22.4513	23.2379	48.2947	56.5918	47.7928	50.8931	21.4919	25.3038	47.7928	31.5295	56	47.9733	93.0347	79.8426	73.6169	79.9481	65.7371	75.7954	73.8269	28.4393	45.3842	33.728	35.8505	48.6799	44.4725	36.5158	43.2228	57	68.6432	70.458	85.6977	74.933	51.2737	31.6917
77	58.822	45.8358	37.3411	47.333	41.2105	40.8052	40.0535	40.6897	77	56.0706	64.539	45.5992	55.4029	23.3708	23.6956	21.9945	23.0203	52.2916	59.1052	40.5078	50.6349	26.1075	29.1552	40.5078	31.9235	60	44.2778	75.2279	79.9571	66.4876	108.19	63.2593	62.8616	78.1037	34.4491	56.1054	35.5205	42.025	57.3017	46.7572	33.1363	45.7317	61	90.2095	125.127	81.1845	98.8404	51.6943	0
81		53.9534	39.7015	46.8274	33.2987	36.1844	45.2677	38.2503	81	71.7567	70.1858	45.0908	62.3444	22.1366	22.4958	23.0872	22.5732	44.2141	43.6701	43.9737	43.9526	23.6682	23.7704	43.9737	30.4707	64	58.806	62.7979	64.5199	62.0412	99.57	58.8075	91.448	83.2752	45.5534	62.2336	44.8601	50.8823	75.5419	46.0774	35.2117	52.277	65	63.8976	111.191	54.9985	76.6956	45.4062	32.1406
85		56.5945	44.574	50.5842	33.8909	33.8784	45.0329	37.6007	85	68.159	73.7073	53.6534	65.1732	23.4412	25.7706	24.8069	24.6729	50.6663	45.6936	57.74	51.3666	28.2196	22.8422	57.74	36.2672	68	56.1606	59.4109	72.9721	62.8479	94.803	62.8536	110.741	89.466	43.957	59.0057	55.3344	52.7657	100.618	47.8856	32.0884	60.1973	69	65.6972	47.5	49.8186	54.3386	52.3345	43.4382
89					45.2648	35.4748	38.2505	39.6634	89	87.744	62.6623	33.6737	61.36	23.4599	23.1864	24.3585	23.6683	50.2607	44.0763	45.0847	46.4739	21.541	25.0496	45.0847	30.5584	72	43.9715	44.1401	82.126	56.7459	93.997	66.8998	81.0627	80.6532	54.2889	50.4725	81.1151	61.9588	79.648	55.4276	33.4378	56.1711	73	74.7344	74.9624	52.8653	67.5207	56.4047	57.5407
93					61.055	34.3294	36.616	44.0001	93	78.6858	75.2536	26.2628	60.0674	22.5344	25.4163	27.0951	25.0153	54.252	47.8745	43.3303	48.4856	21.6852	24.2675	43.3303	29.761	76	45.0278	32.3729	69.8143	49.0717	75.6092	44.1238	47.5199	55.751	55.1667	66.1102	77.6144	66.2971	98.0146	73.0957	38.3255	69.8119	77	67.4797	37.0648	65.7471	56.7639	65.9772	74.6328
																										80	40.4756	33.7635	56.7717	43.6703	62.8084	42.87	38.8176	48.1654	58.7097	63.3434	55.8801	59.3111	104.666	84.1891	59.1243	82.6599	81	60.2866	61.1446	50.4045	57.2786	66.8683	60.7915
																										84	40.1136	37.9614	41.1933	39.7561	52.1214	45.2158	36.1947	44.5106	67.967	81.5753	62.5157	70.686	82.3818	74.6844	46.345	67.8037	85	94.5878	73.7561	55.6363	74.66	59.8018	0
																										88	26.3308	34.2222	41.4112	33.9881	48.9382	38.7187	37.6842	41.7804	68.3287	91.2491	75.0585	78.2121	86.0135	88.0012	43.297	72.4372	89	79.0123	80.1452	54.4071	71.1882	59.1629	61.8488
																										92	27.1303	46.3836	37.091	36.8683	35.1857	46.5486	45.1354	42.2899	52.4407	69.9597	87.6013	70.0006	86.7191	70.9044	59.0708	72.2314		90.8202	80.169	65.8409	78.9434
																										96	34.1271	66.7018	37.7591	46.196	34.9307	43.8187	49.8216	42.857	55.2007	99.7482	85.8855	80.2781	91.8899	64.0724	66.6067	74.1897		62.2501	69.2304	39.8763	57.1189
																										100	29.937	47.3807	33.5902	36.9693	42.472	45.1789	49.0525	45.5678	59.4686	82.1783	86.0533	75.9001	84.7808	79.2985	70.7016	78.2603		46.5751	67.2477	32.5614	48.7947
																										104	44.7213	61.0868	36.2033	47.3371	45.6614	44.0904	47.2141	45.6553	61.8655	70.3827	76.4364	69.5615	91.7473	87.4802	55.5764	78.268		80.9808	83.1579	32.6954	65.6114
																										108		80.8496	47.8276	64.3386	43.8873	42.0892		42.9882	69.7093	90.4592	75.4916	78.5534	80.5769	87.1182	49.3486	72.3479		67.8823	85.8577		76.87
																										112			61.7975	61.7975	49.0229	39.7593		44.3911		74.6223		74.6223						64.9523	71.9781		68.4652
																													58.0914	58.0914														49.0366			49.0366
[truncated: 15 more columns]

## Sheet: Tab.S8
Bulk density [kg m-3]
Degerö									Lakkasuo	Ombrotrophic sites								Minerotrophic sites								Breitlohmisse																	Rotemeer Moor
	Nautral sites (DN) 1-3				Drained sites (DD)					Natural sites (LNo) 1-3								Natural sites (LNm) 1-3									Natural sites (BN) 1-3				Natural dry sites (BNd) 1-3				Drained sites (BD1) 1-3				Near the edge sites (BD2) 1-3					Natural sites (RN) 1-3				Drained sites (RD1) 1-3
depth [cm]	DN1	DN2	DN3	av. DN	DD1	DD2	DD3	av. DD	depth [cm]	LNo1	LNo2	LNo3	av. LNo	LDo1	LDo2	LDo3	av. Ldo	LNm1	LNm2	LNm3	av. LNm	LDm1	LDm2	LDm3	av. LDm	depth [cm]	BN1	BN2	BN3	av. BN	BNd1	BNd2	BNd3	av. BNd	BD11	BD12	BD13	av. BD1	BD21	BD22	BD23	av. BD2	depth [cm]	RN1	RN2	RN3	av. RN	RD11	RD12
1	0.0111061	0.0217588	0.0129193	0.0152614	0.0187217	0.00825023	0.0344515	0.0204745	1	0.00726562	0.020625	0.0146875	0.0141927	0.016875	0.0244531	0.039375	0.026901	0.00585938	0.00460937	0.00664062	0.00570312	0.0278906	0.0225781	0.0164844	0.0223177	2	0.0504167	0.0444286	0.0457143	0.0468532	0.0303704	0.0475	0.0425735	0.040148	0.0578272	0.133352	0.0702344	0.0871379	0.0457778	0.033268	0.0297222	0.036256	1	0.003475	0.0143	0.01025	0.00934167	0.01075	0.00925
5	0.0125567	0.0215775	0.0107434	0.0149592	0.0154125	0.00716228	0.0364914	0.0196887	5	0.0154688	0.025	0.0216406	0.0207031	0.0580469	0.0338281	0.0892969	0.0603906	0.0135938	0.0178906	0.0161719	0.0158854	0.0404687	0.0573437	0.0696094	0.0558073	4	0.0605556	0.0575	0.0517857	0.0566138	0.0243704	0.0317857	0.0318596	0.0293386	0.0724615	0.126096	0.0707639	0.0897739	0.0511111	0.0328758	0.0447222	0.0429031	3	0.0051	0.01865	0.00855	0.0107667	0.00865	0.0124
9	0.00929284	0.0205802	0.0160471	0.0153067	0.0157298	0.0105621	0.0336355	0.0199758	9	0.0171875	0.0370313	0.0227344	0.025651	0.0503125	0.0994531	0.110234	0.0866667	0.0238281	0.0260937	0.0197656	0.0232292	0.0371875	0.0473438	0.0696094	0.0513802	6	0.0545238	0.0592647	0.0683036	0.0606974	0.0240336	0.0537143	0.0365179	0.0380886	0.104176	0.149702	0.132891	0.128923	0.0462573	0.0386029	0.0514583	0.0454395	5	0.0292	0.0215	0.01175	0.0208167	0.01305	0.0146
13	0.0178604	0.018359	0.0255666	0.0205953	0.0601088	0.0384406	0.0573889	0.0519794	13	0.0239063	0.0276562	0.0210937	0.0242187	0.0678125	0.0792969	0.0710938	0.0727344	0.0640625	0.0414063	0.0205469	0.0420052	0.144453	0.0957031	0.153984	0.13138	8	0.0636667	0.0472917	0.0707237	0.0605607	0.0281818	0.0552381	0.0364583	0.0399594	0.129872	0.157438	0.175577	0.154295	0.0676023	0.0352941	0.0506944	0.051197	7	0.0291	0.02255	0.0208	0.02415	0.01515	0.0163
17	0.0348141	0.0325023	0.0260653	0.0311272	0.050272	0.0432457	0.0532638	0.0489272	17	0.0270313	0.0286719	0.0255469	0.0270833	0.061875	0.0728125	0.0717187	0.0688021	0.0608594	0.03875	0.0291406	0.0429167	0.186406	0.211953	0.197344	0.198568	10	0.013146	0.0240254	0.0613889	0.0328534	0.0203922	0.062381	0.0354706	0.0394146	0.135536	0.149671	0.12602	0.137076	0.0583977	0.0371242	0.0733333	0.0562851	9	0.03465	0.0283	0.0209	0.02795	0.02595	0.01435
21	0.0382593	0.0349501	0.0364007	0.0365367	0.0508613	0.0889393	0.0573436	0.0657147	21	0.0214063	0.0321875	0.0348438	0.0294792	0.0634375	0.0723438	0.0719531	0.0692448	0.0807812	0.0364844	0.0450781	0.0541146	0.102813	0.157812	0.134141	0.131589	12	0.0231188	0.0385313	0.0476608	0.036437	0.0271985	0.0480508	0.0369286	0.0373926	0.152765	0.1233	0.111514	0.129193	0.109701	0.12194	0.0942883	0.108643	11	0.0163191	0.02125	0.0198	0.019123	0.0357	0.02115
25	0.0265639	0.019311	0.0261106	0.0239952	0.056165	0.0815956	0.0663191	0.0680266	25	0.0314062	0.045625	0.0291406	0.0353906	0.0610938	0.0747656	0.0683594	0.0680729	0.1175	0.0545313	0.0804688	0.0841667	0.102109	0.117422	0.110234	0.109922	14	0.0226655	0.0299184	0.0376247	0.0300695	0.0553037	0.0457842	0.0374815	0.0461898	0.136899	0.108341	0.099728	0.114989	0.134633	0.127833	0.0852221	0.115896	13	0.0231188	0.0113327	0.0099728	0.0148081	0.0586	0.0217
29	0.0269719	0.0220308	0.0255213	0.0248413	0.0626473	0.0728921	0.0808704	0.0721366	29	0.03375	0.0435938	0.0308594	0.0360677	0.0521875	0.0692187	0.0495312	0.0569792	0.107578	0.0832813	0.0511719	0.0806771	0.0866406	0.111406	0.0952344	0.0977604	16	0.0181324	0.0344515	0.0339982	0.0288607	0.0897552	0.0553037	0.0698096	0.0716228	0.13282	0.0983681	0.0897552	0.106981	0.0956482	0.150045	0.0766092	0.107434	15	0.0199456	0.0194923	0.011786	0.0170746	0.0466908	0.0412511
33	0.0319583	0.0199003	0.0218495	0.0245694	0.0609248	0.0570263	0.087806	0.0685857	33	0.036875	0.044375	0.0296875	0.0369792	0.0525781	0.075	0.0663281	0.0646354	0.117344	0.119688	0.0984375	0.111823	0.0742188	0.0842969	0.0888281	0.0824479	18	0.0362647	0.0335449	0.0389846	0.0362647	0.0992747	0.0403445	0.0951949	0.0782714	0.113327	0.107888	0.0911151	0.10411	0.0956482	0.12194	0.0670898	0.0948927	17	0.0203989	0.019039	0.013146	0.017528	0.0489574	0.0539438
37	0.0223935	0.0305077	0.025884	0.0262617	0.0592022	0.0636446	0.0728015	0.0652161	37	0.0434375	0.0496875	0.0240625	0.0390625	0.0573437	0.0899219	0.0570313	0.068099	0.0948438	0.122422	0.115391	0.110885	0.0766406	0.0914062	0.0779688	0.0820052	20	0.0317316	0.0276519	0.0258386	0.0284074	0.087942	0.0553037	0.102448	0.0818979	0.137353	0.126927	0.06165	0.108643	0.0979148	0.112874	0.082049	0.0976126	21	0.0199456	0.0145059	0.0135993	0.0160169	0.0643699	0.055757
41	0.0210335	0.0347235	0.0303717	0.0287096	0.0653218	0.0582956	0.0735721	0.0657298	41	0.0405469	0.0460938	0.0319531	0.0395312	0.0492969	0.107813	0.111094	0.089401	0.075	0.084375	0.101641	0.0870052	0.1075	0.0921875	0.0842969	0.0946615	24	0.0222121	0.06165	0.0281052	0.0373225	0.082049	0.0398912	0.0702629	0.0640677	0.0838622	0.0974615	0.0530372	0.0781203	0.055757	0.0897552	0.0838622	0.0764581	27	0.030825	0.019039	0.0167724	0.0222121	0.093835	0.057117
45	0.0280598	0.0348141	0.0558477	0.0395739	0.0684497	0.0912511	0.0473708	0.0690239	45	0.0626562	0.0486719	0.0377344	0.0496875	0.0869531	0.0728906	0.08	0.0799479	0.074375	0.0822656	0.0929687	0.0832031	0.0920313	0.0939062	0.0800781	0.0886719	28	0.0299184	0.0503173	0.0489574	0.0430644	0.082049	0.0738894	0.0834089	0.0797824	0.111514	0.0983681	0.0516772	0.0871865	0.0752493	0.12466	0.0770626	0.092324	29	0.0226655	0.0199456	0.030825	0.0244787	0.0906618	0.0562103
49	0.030825	0.0451949	0.044243	0.0400876	0.105576	0.0912511	0.0636446	0.0868238	49	0.038125	0.0548437	0.068903	0.0539572	0.107578	0.0717969	0.0822656	0.0872135	0.0635938	0.0698437	0.0735156	0.0689844	0.0750781	0.0917969	0.0680469	0.0783073	32	0.0326383	0.0398912	0.0494107	0.0406467	0.0575703	0.0471442	0.0485041	0.0510728	0.114234	0.0829556	0.0575703	0.0849199	0.0843155	0.0757026	0.0539438	0.0713206	33	0.0253853	0.0176791	0.0290118	0.0240254	0.099728	0.0893019
53	0.0394379	0.0613327	0.0514959	0.0507555	0.0578876	0.0784678	0.0888486	0.075068	53	0.0398912	0.0788758	0.0471442	0.0553037	0.0462375	0.0920218	0.0752493	0.0711695	0.0580236	0.0512239	0.0276519	0.0456331	0.0611967	0.103808	0.0888486	0.0846177	36	0.0299184	0.0611967	0.082049	0.0577214	0.0589302	0.0421578	0.0512239	0.0507706	0.109248	0.11786	0.0711695	0.0994258	0.0906618	0.0951949	0.0562103	0.080689	37	0.0444243	0.0158658	0.0181324	0.0261408	0.086582	0.0770626
57	0.02466	0.0455576	0.0457842	0.0386673	0.107616	0.114597	0.117044	0.113086	57	0.0743427	0.0670898	0.0670898	0.0695074	0.0906618	0.114687	0.0634633	0.0896041	0.0512239	0.0852221	0.0598368	0.0654276	0.0543971	0.102448	0.105621	0.0874887	40	0.0267452	0.0317316	0.0621034	0.0401934	0.0562103	0.0371714	0.0553037	0.0495618	0.1233	0.107434	0.0639166	0.098217	0.0870354	0.115141	0.0607434	0.0876398	41	0.0326383	0.0135993	0.0412511	0.0291629	0.115141	0.11786
61	0.0205349	0.0539891	0.0859474	0.0534905	0.102629	0.11505	0.11718	0.11162	61	0.0797824	0.0675431	0.0684497	0.0719251	0.0888486	0.105168	0.0566636	0.08356	0.0743427	0.0652765	0.0516772	0.0637655	0.0861287	0.105621	0.103354	0.0983681	44	0.024932	0.0362647	0.0720762	0.0444243	0.0435177	0.0303717	0.0562103	0.0433666	0.122393	0.133273	0.0874887	0.114385	0.120127	0.0956482	0.0566636	0.0908129	45	0.0407978	0.0217588	0.0344515	0.0323361	0.125113	0.13146
65	0.0225748	0.0425657	0.0519492	0.0390299	0.134769	0.173119	0.13078	0.146222	65	0.0661831	0.0861287	0.0725295	0.0749471	0.0761559	0.0893019	0.0652765	0.0769115	0.0702629	0.0961015	0.0679964	0.0781203	0.099728	0.0992747	0.0883953	0.0957993	48	0.0226655	0.0421578	0.0725295	0.0457842	0.0503173	0.0426111	0.036718	0.0432155	0.118314	0.13282	0.0584769	0.103203	0.129646	0.0861287	0.0462375	0.0873376	49	0.0407978	0.0339982	0.0176791	0.030825	0.111061	0.186763
69	0.0267452	0.0465095	0.0416591	0.0383046	0.126247	0.15893	0.113871	0.133016	69	0.0743427	0.0961015	0.0358114	0.0687519	0.0698096	0.0757026	0.0929284	0.0794802	0.0675431	0.0947416	0.082049	0.0814445	0.0893019	0.109248	0.0775159	0.0920218	52	0.0262919	0.0330916	0.0575703	0.0389846	0.0457842	0.0330916	0.043971	0.0409489	0.102901	0.144152	0.0698096	0.105621	0.125113	0.101541	0.0784225	0.101692	53	0.0339982	0.0503173	0.0281052	0.0374736	0.103354	0.1301
73	0.019175	0.0591568	0.0403445	0.0395588	0.125068	0.106981	0.170943	0.134331	73	0.086582	0.108794	0.0716228	0.0889997	0.0788758	0.0893019	0.0702629	0.0794802	0.103808	0.0929284	0.0811423	0.0926262	0.0947416	0.087942	0.0738894	0.0855243	56	0.0135993	0.0181324	0.0358114	0.0225144	0.0448776	0.0344515	0.057117	0.045482	0.11922	0.1165	0.074796	0.103506	0.116047	0.0983681	0.0797824	0.0980659	57	0.0167724	0.0181324	0.0222121	0.019039	0.0725295	0.104261
77	0.0162285	0.0480508	0.0487307	0.03767	0.151813	0.139755	0.128876	0.140148	77	0.0729828	0.074796	0.0707162	0.0728317	0.0893019	0.0856754	0.0883953	0.0877909	0.0761559	0.0779692	0.0983681	0.0841644	0.0924751	0.123753	0.0752493	0.0971593	60	0.0480508	0.0652765	0.032185	0.0485041	0.0466908	0.038078	0.0362647	0.0403445	0.0888486	0.114687	0.116047	0.106528	0.112874	0.0738894	0.101541	0.0961015	61	0.0163191	0.0185857	0.0172257	0.0173769	0.0670898	0.0757026
81		0.0527652	0.0522665	0.0525159	0.19728	0.154986	0.127017	0.159761	81	0.0811423	0.0698096	0.0543971	0.0684497	0.0888486	0.074796	0.0566636	0.0734361	0.0915684	0.0793291	0.0883953	0.0864309	0.0856754	0.125113	0.074796	0.0951949	64	0.0507706	0.0752493	0.0480508	0.0580236	0.0485041	0.0575703	0.0339982	0.0466908	0.0965549	0.107434	0.1233	0.109096	0.082049	0.0693563	0.117407	0.0896041	65	0.0208522	0.0149592	0.00951949	0.0151103	0.0679964	0.0457842
85		0.0361741	0.0427017	0.0394379	0.197597	0.214098	0.130825	0.18084	85	0.0598368	0.0693563	0.0738894	0.0676942	0.0933817	0.0856754	0.055757	0.0782714	0.106528	0.0684497	0.101088	0.0920218	0.0883953	0.12058	0.0625567	0.0905107	68	0.0403445	0.0716228	0.0530372	0.0550015	0.0457842	0.0453309	0.0607434	0.0506195	0.125567	0.126473	0.0893019	0.113781	0.0802357	0.153672	0.12466	0.119523	69	0.0126927	0.00770626	0.013146	0.0111816	0.0639166	0.0766092
89					0.127289	0.169311	0.137126	0.144575	89	0.0539438	0.0539438	0.0589302	0.0556059	0.100635	0.0793291	0.0670898	0.0823512	0.0897552	0.0829556	0.086582	0.0864309	0.0847688	0.120127	0.0856754	0.0968571	72	0.0611967	0.0675431	0.0521306	0.0602901	0.0480508	0.0457842	0.0607434	0.0515261	0.116047	0.109701	0.0793291	0.101692	0.101995	0.122847	0.110607	0.111816	73	0.024932	0.013146	0.0176791	0.0185857	0.0643699	0.0693563
93					0.127335	0.190843	0.163373	0.160517	93	0.0530372	0.0503173	0.068903	0.0574192	0.080689	0.0548504			0.0811423	0.068903	0.0834089	0.0778181	0.107888	0.0988214	0.121487	0.109399	76	0.0657298	0.082049	0.0634633	0.070414	0.0698096	0.0725295	0.0775159	0.073285	0.104714	0.101541	0.0725295	0.0929284	0.104261	0.102901	0.110607	0.105923	77	0.0262919	0.0126927	0.0231188	0.0207011	0.0702629	0.0648232
																										80	0.0766092	0.116047	0.0743427	0.0889997	0.082049	0.0906618	0.0834089	0.0853732	0.116047	0.0951949	0.115141	0.108794	0.0893019	0.103808	0.114234	0.102448	81	0.0194923	0.0222121	0.0145059	0.0187368	0.0752493	0.0634633
																										84	0.0861287	0.152312	0.0788758	0.105772	0.0575703	0.093835	0.141432	0.0976126	0.101995	0.0797824	0.0752493	0.0856754	0.117407	0.0548504	0.11922	0.0971593	85	0.024932	0.0240254	0.0154125	0.0214566	0.0779692	0.0589302
																										88	0.0670898	0.12602	0.0711695	0.0880931	0.0902085	0.093835	0.123753	0.102599	0.132366	0.0811423	0.114687	0.109399	0.1165	0.0843155	0.110154	0.103657	89	0.0217588	0.0276519	0.0213055	0.0235721	0.0670898	0.0593835
																										92	0.121487	0.105621	0.0788758	0.101995	0.11786	0.0911151	0.117407	0.108794	0.104261	0.104714	0.131913	0.113629	0.0897552	0.0797824	0.0883953	0.0859776		0.0258386	0.0235721	0.0258386	0.0250831
																										96	0.0988214	0.112874	0.111061	0.107585	0.117407	0.109701	0.110154	0.112421	0.0924751	0.0906618	0.0974615	0.0935328	0.102901	0.0643699	0.080689	0.0826534		0.0163191	0.0181324	0.0353581	0.0232699
																										100	0.0802357	0.131913	0.13282	0.114989	0.112421	0.0797824	0.12874	0.106981	0.0924751	0.0965549	0.0779692	0.0889997	0.113781	0.101541	0.0720762	0.0957993		0.0240254	0.0281052	0.0258386	0.0259897
																										104	0.0516772	0.0797824	0.0933817	0.0749471	0.0906618	0.0906618	0.111061	0.0974615	0.0779692	0.0838622	0.0915684	0.0844666	0.0942883	0.136899	0.0598368	0.0970082		0.0181324	0.0326383	0.0163191	0.0223633
																										108	0.0362647	0.0752493	0.0766092	0.0627078	0.093835	0.0838622	0.13282	0.103506	0.068903	0.0911151	0.0648232	0.0749471	0.0625567	0.0915684	0.0675431	0.0738894		0.0149592	0.0222121	0.0167724	0.0179813
																										112					0.0646718	0.0497104	0.0947416	0.069708										0.0126927	0.019039	0.0145059	0.0154125
[truncated: 15 more columns]
