# Supplementary material for: Switch of fungal to bacterial degradation in natural, drained and rewetted oligotrophic peatlands reflected in δ 15 N and fatty acid composition
Source: Copernicus journal article supplement (doi:10.5194/soil-6-299-2020), 2020-07-17
Supplement: Supplementary file 2 [file soil-6-299-2020-supplement.zip]

Archive with 2 entries (2 files):
- Supplementary material.xlsx
- soil-6-299-2020-supplement-title-page.pdf
